# Supplementary material
Source: PubMed Central journal article supplement (PMC2729325)

Glucuronidation of the antiretroviral drug efavirenz (EFV) by UGT2B7 and an in vitro investigation of drug-drug interaction with zidovudine (AZT).

## **LEGENDS OF SUPPLEMENTARY FIGURES**

### **Supplementary Figure 1**

Formation of EFV and AZT glucuronide derivative by microsomal proteins isolated from HEK293 cells stably expressing human UGT proteins. Top, EFV and AZT glucuronidation activity at a 0.2 mM substrate concentration (see Materials and Methods). Bottom, relative UGT content was assessed by Western blot for each isoform using anti-UGT1A and anti-UGT2B antibodies. (UGT1A1 microsomes and UGT2B7 microsomes were arbitrarily set to 1.0 for UGT1A and UGT2B family members, respectively).

### **Supplementary Figure 2**

Kinetic profiles for the glucuronidation of EFV and AZT by HLM and UGT2B7. Microsomal fractions from HLM, UGT2B7\*1- and UGT2B7\*2-HEK293 cells were incubated in the presence of increasing concentrations of EFV (1 to 80  $\mu$ M) or AZT (100 to 5000  $\mu$ M) for 1 h. Absolute glucuronidation activities determined by LC-MS/MS were divided by the content of UGT protein assessed by Western blot and expressed as relative glucuronidation activities in picomoles per minute per milligram.

Glucuronidation of the antiretroviral drug efavirenz (EFV) by UGT2B7 and an in vitro investigation of drug-drug interaction with zidovudine (AZT).

Supplementary Figure 1

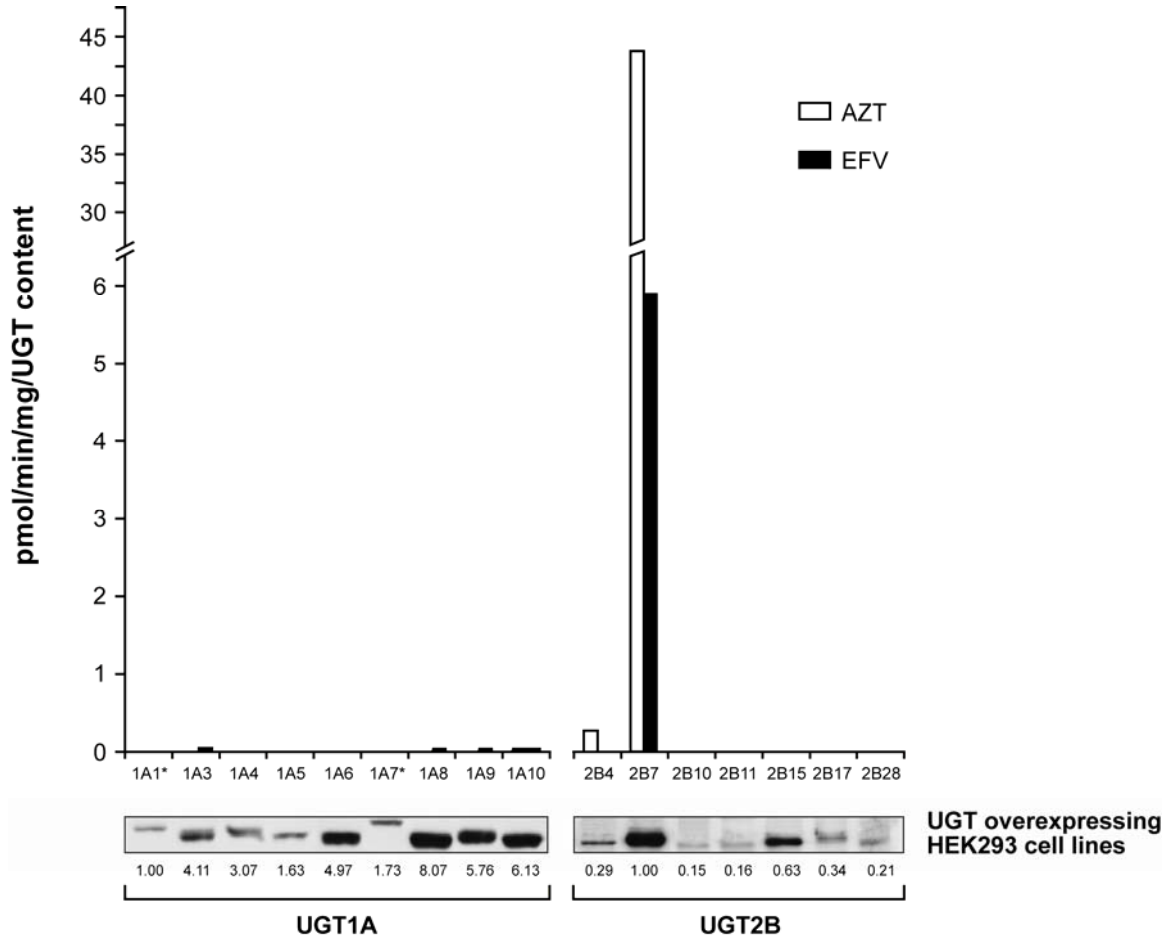

Glucuronidation of the antiretroviral drug efavirenz (EFV) by UGT2B7 and an in vitro investigation of drug-drug interaction with zidovudine (AZT).

**Supplementary Figure 2**

**A) EFV glucuronidation**

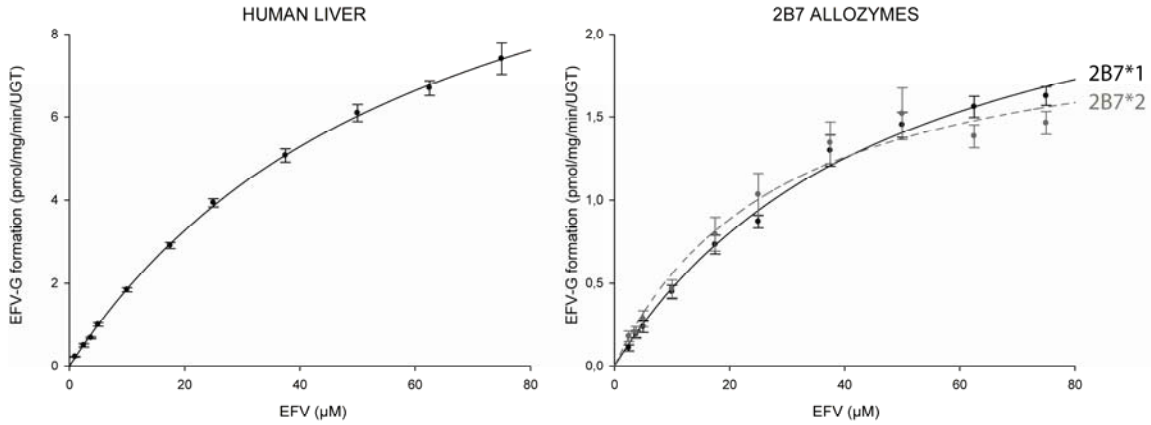

**B) AZT glucuronidation**

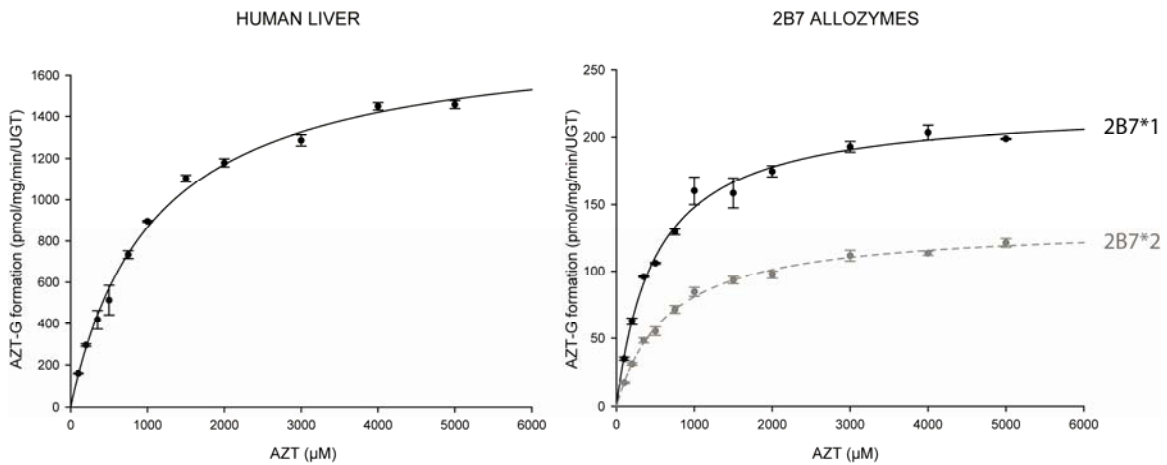

Supplement: 109.027706_1.pdf [file 109.027706_1.pdf]
